# Supplementary material for: Breast density and risk of breast cancer
Source: PubMed Central journal article supplement — Int J Cancer. 2022 Oct 27;152(6):1150–8. doi: 10.1002/ijc.34316 (PMC10091988; doi:10.1002/ijc.34316), 2022-10-27
Supplement: IJC-152-1150-s001.pdf [file IJC-152-1150-s001.pdf]

Supplemental Tables for:

Elsebeth Lynge, Ilse Vjeborg, Martin Lillholm, Mads Nielsen, George Napolitano, My von Euler-Chelpin:  
BREAST DENSITY AND RISK OF BREAST CANCER

Supplementary Table 1. Rate ratio (RR) and 95% confidence interval (in parentheses) of breast cancer incidence by BI-RADS density code at first screen in recruitment period, Capital Region, Denmark, 2012-2020, by age at recruitment. Baseline = All women.

Supplementary Table 2. Number of women aged 50-69 at recruitment; density at recruitment and density at last screen. Women with missing density on first and/or last screen excluded.

Supplementary Table 1. Rate ratio (RR) and 95% confidence interval (in parentheses) of breast cancer incidence by BI-RADS density code at first screen in recruitment period, Capital Region, Denmark, 2012-2020, by age at recruitment. Baseline = All women.

| Age at recruitment            | BI-RADS density at time of recruitment |                  |                  |                  |                  |
|-------------------------------|----------------------------------------|------------------|------------------|------------------|------------------|
|                               | 1                                      | 2                | 3                | 4                | 3+4              |
| 50-54 years                   |                                        |                  |                  |                  |                  |
| -Crude RR                     | 0.50 (0.43-0.58)                       | 0.89 (0.82-0.97) | 1.39 (1.30-1.48) | 1.63 (1.39-1.91) | 1.44 (1.36-1.51) |
| -Age-adjusted <sup>1</sup> RR | 0.50 (0.43-0.59)                       | 0.89 (0.82-0.97) | 1.39 (1.29-1.48) | 1.62 (1.38-1.89) | 1.43 (1.36-1.51) |
| 55-59 years                   |                                        |                  |                  |                  |                  |
| -Crude RR                     | 0.66 (0.58-0.74)                       | 1.01 (0.93-1.10) | 1.41 (1.27-1.55) | 1.45 (1.09-1.93) | 1.41 (1.29-1.54) |
| -Age-adjusted <sup>1</sup> RR | 0.66 (0.58-0.75)                       | 1.01 (0.93-1.09) | 1.4 (1.27-1.54)  | 1.46 (1.09-1.94) | 1.41 (1.29-1.54) |
| 60-64 years                   |                                        |                  |                  |                  |                  |
| -Crude RR                     | 0.72 (0.65-0.80)                       | 1.08 (1.00-1.16) | 1.27 (1.15-1.41) | 1.61 (1.21-2.14) | 1.31 (1.20-1.44) |
| ee                            | 0.72 (0.65-0.79)                       | 1.08 (1.00-1.16) | 1.28 (1.15-1.41) | 1.61 (1.21-2.14) | 1.32 (1.20-1.44) |
| 65-69 years                   |                                        |                  |                  |                  |                  |
| -Crude RR                     | 0.63 (0.57-0.69)                       | 1.27 (1.20-1.35) | 1.22 (1.09-1.37) | 1.12 (0.78-1.59) | 1.21 (1.09-1.34) |
| -Age adjusted <sup>1</sup> RR | 0.63 (0.57-0.69)                       | 1.27 (1.20-1.35) | 1.22 (1.09-1.36) | 1.11 (0.78-1.57) | 1.21 (1.09-1.34) |
| Total 50-69 years             |                                        |                  |                  |                  |                  |
| -Crude RR                     | 0.66 (0.62-0.69)                       | 1.07 (1.03-1.11) | 1.28 (1.22-1.34) | 1.39 (1.23-1.56) | 1.30 (1.25-1.35) |
| -Age adjusted <sup>1</sup> RR | 0.63 (0.60-0.67)                       | 1.07 (1.03-1.11) | 1.32 (1.26-1.38) | 1.49 (1.32-1.67) | 1.35 (1.29-1.40) |
| Total 50-64 years             |                                        |                  |                  |                  |                  |
| -Crude RR                     | 0.66 (0.61-0.70)                       | 1.00 (0.95-1.04) | 1.32 (1.25-1.39) | 1.48 (1.30-1.68) | 1.35 (1.29-1.40) |
| -Age adjusted <sup>1</sup> RR | 0.64 (0.59-0.68)                       | 0.99 (0.95-1.04) | 1.35 (1.28-1.42) | 1.56 (1.38-1.77) | 1.38 (1.33-1.44) |

Note: 1) adjusted by running age in 5-year age groups

Supplemenraty Table 2. Number of women aged 50-69 at recruitment; density at recruitment and density at last screen. Women with missing density on first and/or last screen excluded.

| Density at recruitment | Total number of women at recruitment | Screened 1 time | Screened 2+ times         |       |       |      |        | Total |
|------------------------|--------------------------------------|-----------------|---------------------------|-------|-------|------|--------|-------|
|                        |                                      |                 | Density at ls last screen |       |       |      | Total  |       |
|                        |                                      |                 | 1                         | 2     | 3     | 4    |        |       |
| 1                      | 61964                                | 18434           | 37513                     | 5916  | 84    | 17   | 43530  |       |
| 2                      | 72145                                | 21129           | 10047                     | 36006 | 4905  | 58   | 51016  |       |
| 3                      | 45705                                | 13331           | 263                       | 10090 | 20015 | 2006 | 32374  |       |
| 4                      | 8956                                 | 2973            | 53                        | 181   | 2538  | 5211 | 5983   |       |
| Total                  | 188770                               | 55867           | 47876                     | 52193 | 27542 | 7292 | 132903 |       |

Percent women with 2+ screens: 70.4%

Of these, percent women with constant BI-RADS density: 74.3%

Of these, percent women with BI-RADS density decreasing one step from first to last screen: 9.7%

Of these, percent women with BI-RADS density increasing one step from first to last screen: 17.1%

Of these, percent women with BI-RADS density changing more than one step from first to last screen: 0.5%
